# Supplementary material
Source: PubMed Central journal article supplement (PMC5810955)
Supplement: NIHMS939808-supplement.pdf [file NIHMS939808-supplement.pdf]

## SUPPLEMENTARY INFORMATION

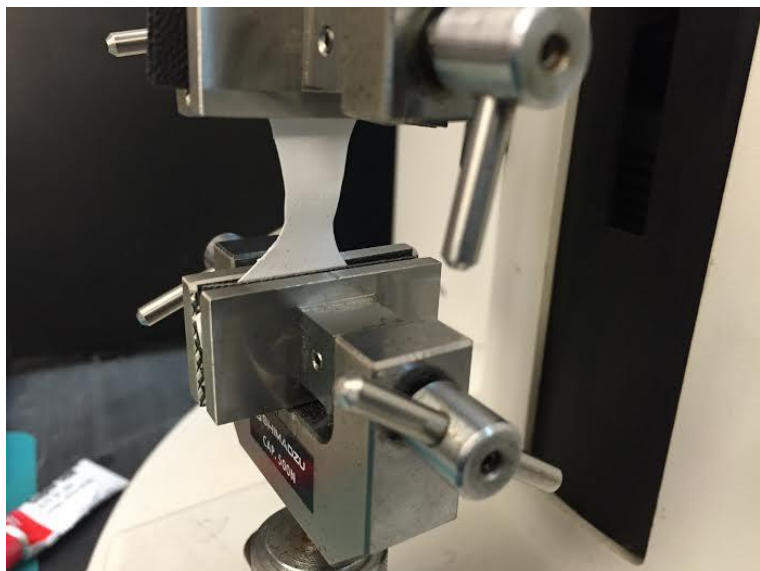

**Figure S1.** Tensile testing set-up for PLGA and PLCL fibers.

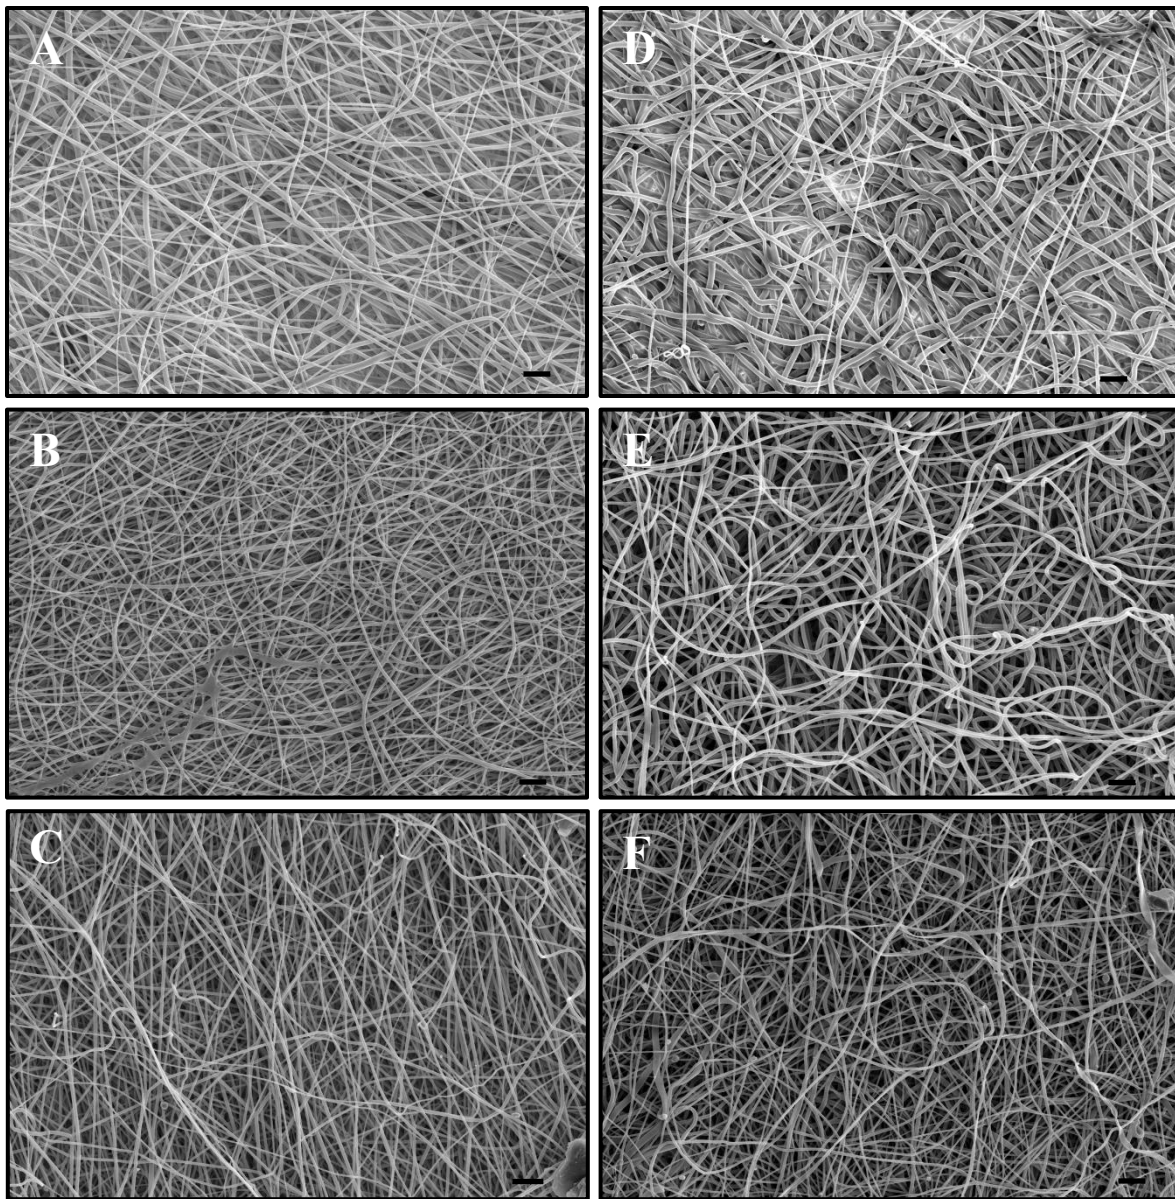

**Figure S2.** SEM images of EFs formed with different weight percentages of ACV. Left column shows PLGA EF microstructure after addition of (A) 1%, (B) 10%, and (C) 20% ACV; and right column shows PLCL EF microstructure after addition of (D) 1%, (E) 10%, and (F) 20% ACV. Scale bar = 10  $\mu$ m.

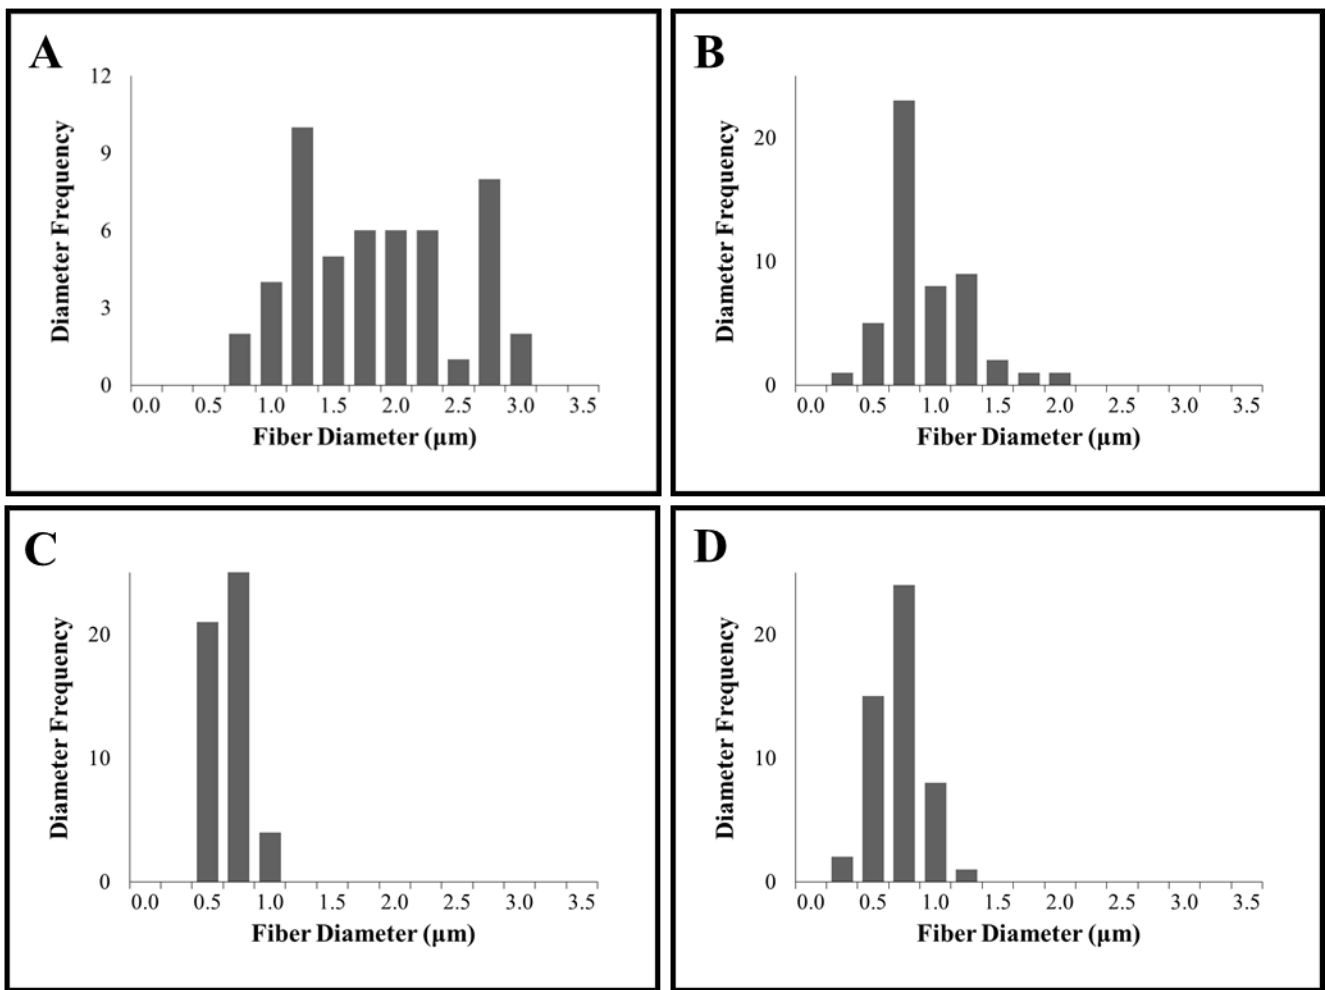

**Figure S3.** Histograms of fiber diameter range and frequency for 15% PLGA EFs with (A) 0%; (B) 1%; (C) 10%; (D) 20% ACV.

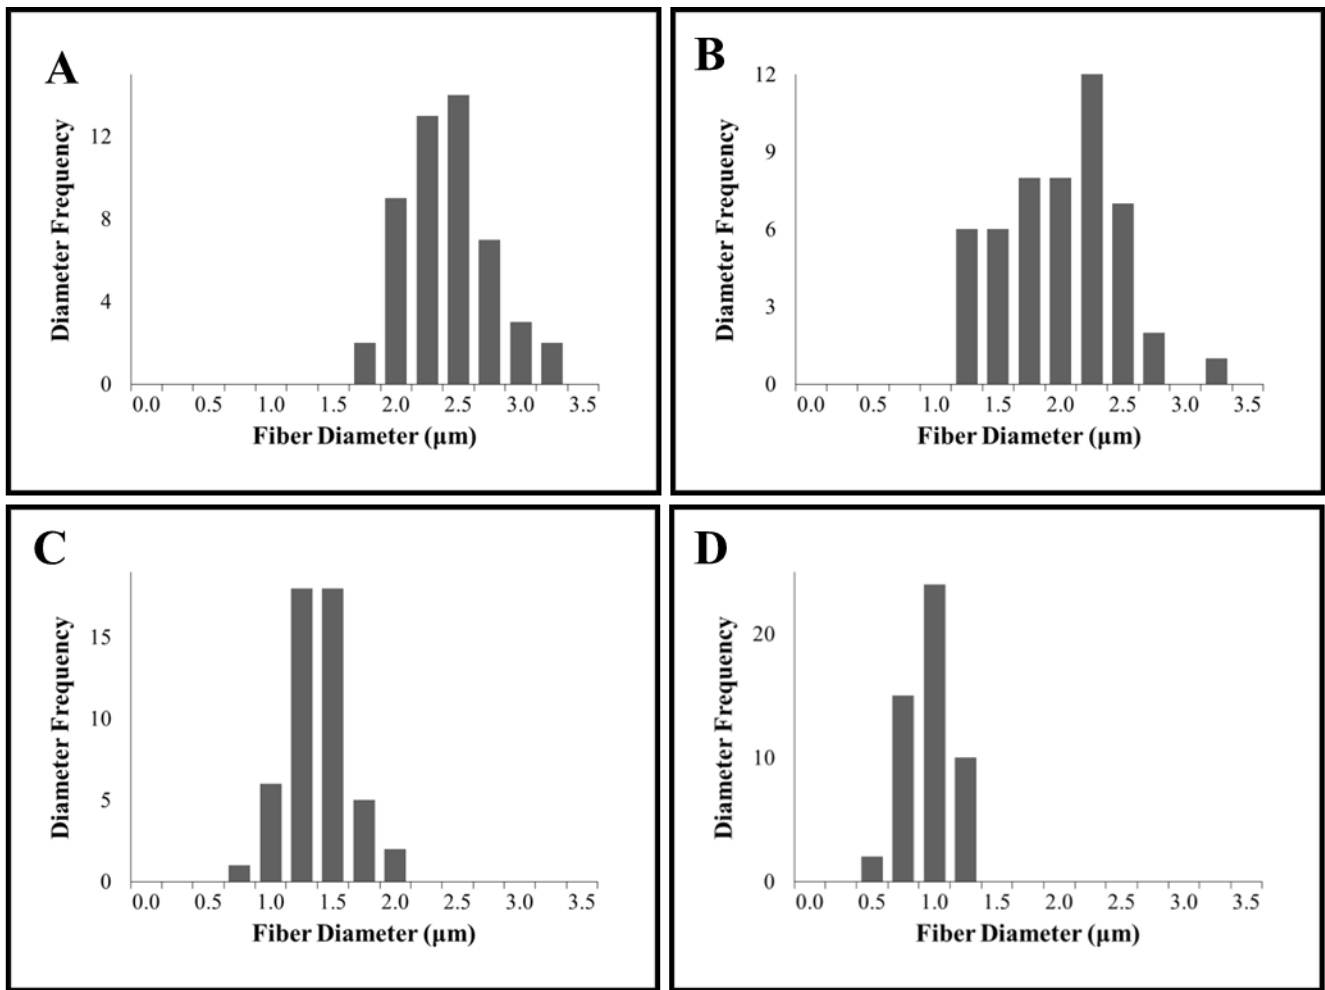

**Figure S4.** Histograms of fiber diameter range and frequency for 12% PLCL EFs with (A) 0%; (B) 1%; (C) 10%; (D) 20% ACV.

**Table S1.** Mean and median fiber diameters for PLGA and PLCL blank and ACV fibers.

| <b>Sample Name</b>  | <b>Mean (<math>\mu\text{m}</math>)</b> | <b>Median (<math>\mu\text{m}</math>)</b> | <b>S.D. (<math>\mu\text{m}</math>)</b> |
|---------------------|----------------------------------------|------------------------------------------|----------------------------------------|
| <b>PLGA Blank</b>   | 1.70                                   | 1.65                                     | 0.64                                   |
| <b>PLGA 1% ACV</b>  | 0.78                                   | 0.69                                     | 0.34                                   |
| <b>PLGA 10% ACV</b> | 0.54                                   | 0.56                                     | 0.15                                   |
| <b>PLGA 20% ACV</b> | 0.58                                   | 0.58                                     | 0.19                                   |
| <b>PLCL Blank</b>   | 2.30                                   | 2.27                                     | 0.38                                   |
| <b>PLCL 1% ACV</b>  | 1.89                                   | 1.89                                     | 0.47                                   |
| <b>PLCL 10% ACV</b> | 1.23                                   | 1.23                                     | 0.25                                   |
| <b>PLCL 20% ACV</b> | 0.83                                   | 0.82                                     | 0.17                                   |

**Table S2.** Average conductivity of initial solvents tested with PLGA, and solvent plus polymer (PLGA or PLCL) and ACV. As expected from literature references and the non-polar nature of the polymers, sample conductivities (with the exception of the known standard) measured below the limit of detection.

| <b>Sample Name</b>                                | <b>Conductivity (<math>\mu\text{S/cm}</math>)</b> |
|---------------------------------------------------|---------------------------------------------------|
| <b>HFIP only</b>                                  | 4                                                 |
| <b>HFIP PLGA Blank</b>                            | 4                                                 |
| <b>HFIP PLGA 20% ACV</b>                          | 9                                                 |
| <b>HFIP PLCL Blank</b>                            | 4                                                 |
| <b>HFIP PLCL 20% ACV</b>                          | 6                                                 |
| <b>3:1 CF:DMF PLGA Blank</b>                      | 4                                                 |
| <b>9:1 CF:DMF PLGA Blank</b>                      | 4                                                 |
| <b>1,000 <math>\mu\text{S/cm}</math> Standard</b> | 1398                                              |
| <b>Double distilled water</b>                     | 5                                                 |

**Table S3.** Average viscosity of solvents plus polymer, and solvent plus polymer and ACV.

| <b>Sample Name</b>           | <b>Average Viscosity <math>\pm</math> S.D.<br/>(Centipoise)</b> |
|------------------------------|-----------------------------------------------------------------|
| <b>HFIP Alone</b>            | $-5 \pm 15$                                                     |
| <b>HFIP PLGA Blank</b>       | $1307 \pm 67$                                                   |
| <b>HFIP PLGA 1% ACV</b>      | $512 \pm 19$                                                    |
| <b>HFIP PLGA 10% ACV</b>     | $491 \pm 13$                                                    |
| <b>HFIP PLGA 20% ACV</b>     | $579 \pm 71$                                                    |
| <b>HFIP PLCL Blank</b>       | $1294 \pm 89$                                                   |
| <b>HFIP PLCL 1% ACV</b>      | $727 \pm 29$                                                    |
| <b>HFIP PLCL 10% ACV</b>     | $762 \pm 37$                                                    |
| <b>HFIP PLCL 20% ACV</b>     | $827 \pm 48$                                                    |
| <b>TFE PLGA Blank</b>        | $90 \pm 12$                                                     |
| <b>3:1 CF:DMF PLGA Blank</b> | $90 \pm 23$                                                     |
| <b>9:1 CF:DMF PLGA Blank</b> | $89 \pm 18$                                                     |
